# Supplementary material for: Morphological and genetic variability in cosmopolitan tardigrade species—Paramacrobiotus fairbanksi Schill, Förster, Dandekar & Wolf, 2010
Source: Sci Rep. 2023 Oct 17;13:17672. doi: 10.1038/s41598-023-42653-6 (PMC10582252; doi:10.1038/s41598-023-42653-6)
Supplement: Supplementary file 10 — Supplementary Information 10. [file 41598_2023_42653_MOESM10_ESM.xlsx]

## Sheet: Arkusz1
SPECIMEN	pop	BLpt	SSIPpt	BTEWpt	M1pt	M2pt	M3pt	Mipt	MRpt	PRpt	BLm	BTLm	SSIPm	BTEWm	M1m	M2m	M3m	Mim	MRm	PRm
PL 1	PL	1037	80.4	22.1	18.8	15.2	20.3	10.1	10.8	75	614	59.2	47.6	13.1	11.1	9	12	6	34.4	44.4
PL 2	PL	1111	81.1	18.4	17.2	14.9	20.9	8.8	57.2	77.4	633	57	46.2	10.5	9.8	8.5	11.9	5	32.6	44.1
PL 3	PL	968	80.2	21.3	19.9	16.2	22	9.5	62.3	81.1	549	56.7	45.5	12.1	11.3	9.2	12.5	5.4	35.3	46
PL 4	PL	961	79.7	20.6	18.1	15.3	19.4	8.8	56.9	77.6	535	55.7	44.4	11.5	10.1	8.5	10.8	4.9	31.7	43.2
PL 5	PL	890	80.9	19.8	16	12.9	18.9	8.8	53.2	71.1	373	41.9	33.9	8.3	6.7	5.4	7.9	3.7	22.3	29.8
PL 6	PL	1066	79.6	20.8	16	15.4	21.6	8	55.7	73.3	534	50.1	39.9	10.44	8	7.7	10.8	4	27.9	36.7
PL 7	PL	942	80.7	20.9	17.5	16.5	20.3	9.9	59	79.1	468	49.7	40.1	10.4	8.7	8.2	10.1	4.9	29.3	39.3
PL 8	PL	836	79.3	20.7	16.7	13.5	19.8	8.8	55.2	72.7	371	44.4	35.2	9.2	7.4	6	8.8	3.9	24.5	32.3
PL 9	PL	1005	80.7	21	18.3	16.3	21.5	9.8	58.6	81.4	556	55.3	44.6	11.6	10.1	9	11.9	5.4	32.4	45
PL 10	PL	887	81.3	20.4	15.1	14.2	19.2	8.9	51.4	69.5	369	41.6	33.8	8.5	6.3	5.9	8	3.7	21.4	28.9
PL 11	PL	920	80.9	20.5	16	13.4	20	9.4	56.1	74.5	390	42.4	34.3	8.7	6.8	5.7	8.5	4	23.8	31.6
PL 12	PL	928	80.8	21.1	16.7	14.4	19.2	9	54.9	74.1	401	43.2	34.9	9.1	7.2	6.2	8.3	3.9	23.7	32
PL 13	PL	883	81.7	20.3	15.4	14.1	19.4	8.5	53.1	71.4	414	46.9	38.3	9.5	7.2	6.6	9.1	4	24.9	33.5
PL 14	PL	1002	79.6	21	18.4	15.6	20.5	9.4	58.1	79.5	605	60.4	48.1	12.7	11.1	9.4	12.4	5.7	35.1	48
PL 15	PL	913	81.1	20.1	16.4	14.1	19.3	9.1	53.5	71.4	440	48.2	39.1	9.7	7.9	6.8	9.3	4.4	25.8	34.4
IT 1	IT	966	81.2	22.5	19.1	15.7	20.6	9.2	59.3	76.8	526.86	54.53	44.26	12.27	10.43	8.57	11.24	5	32.35	41.88
IT 2	IT	969	80.6	27.9	21.8	19.4	20.5	8.9	63.1	82.4	632.98	65.29	52.65	18.23	14.23	12.66	13.4	5.8	41.18	53.77
IT 3	IT	989	80.3	23.5	17.3	17.8	21.5	8.3	57.4	72.9	522.45	52.83	42.4	12.39	9.12	9.43	11.38	4.36	30.3	38.5
IT 4	IT	1161	80.9	24.4	18.4	14.8	20	7.9	57.3	72.6	674.83	58.1	47	14.2	10.7	8.57	11.6	4.6	33.3	42.2
USA 1	USA	840	80.3	22.7	17.4	14.5	18.9	30.2	48.2	74.1	473.5	56.4	46.44	12.8	9.8	8.2	10.91	4.36	27.2	42.85
USA 2	USA	858	80.3	32.1	19.3	17.5	18.9	30.2	58	74.1	470	54.8	46.44	17.6	10.6	9.6	10.91	4.36	31.8	42.85
USA 3	USA	988	79.1	24	18.5	14.5	18.7	7.4	59.7	71.5	557.77	56.48	44.68	13.55	10.45	8.2	10.56	4.18	33.72	40.39
USA 4	USA	896	80.7	22.1	18.1	14.2	18.4	8.1	58.3	72.2	522.49	58.29	47.03	12.89	10.56	8.26	10.73	4.7	34	42.11
USA 5	USA	988	81.1	24.9	19.2	16.3	19.5	7.3	57.7	75.9	572.1	57.9	46.94	14.43	11.13	9.42	11.3	4.21	33.4	43.95
USA 6	USA	1008	80.4	23.3	20.4	17.7	18.8	7.4	60.1	76.7	590.77	58.6	47.1	13.66	11.96	10.39	11.04	4.33	35.22	44.97
USA 7	USA	772	80.3	29.1	11.2	16	18.9	30.2	48.6	74.1	491	63.6	46.44	18.5	7.1	10.2	10.91	4.36	30.9	42.85
USA 8	USA	763	80.3	27.6	14.3	13.1	18.9	30.2	48.7	74.1	442	57.9	46.44	16	8.3	7.6	10.91	4.36	28.2	42.85
USA 9	USA	871	80.5	27.1	22	16.4	19.5	8.1	57.1	74.4	495.38	56.88	45.8	15.4	12.5	9.3	11.1	4.6	32.47	42.3
Antar 1	ANTAR	1129	81.1	22.1	18.4	15.9	21.1	10.9	59	81	719	63.7	51.68	14.1	11.69	10.1	13.43	6.93	37.57	51.59
Antar 2	ANTAR	946	80.8	22.5	16.4	14.1	19.8	8.8	54.1	71.7	488.84	51.68	41.78	11.63	8.49	7.3	10.23	4.55	27.97	37.05
Antar 3	ANTAR	1121	79.4	22.4	18.3	15.7	20.9	9.1	58.1	79.2	686.59	61.23	48.61	13.7	11.2	9.6	12.8	5.6	35.6	48.5
Antar 4	ANTAR	1030	82.6	22.5	16.8	15.3	20.7	8.4	58.2	78.2	562.46	54.6	45.1	12.3	9.2	8.35	11.3	4.6	31.79	42.68
Antar 5	ANTAR	1222	79.6	22.3	17.2	15.4	20.3	8.5	56.2	77	702.7	57.5	45.79	12.8	9.87	8.83	11.7	4.9	32.3	44.3
Antar 6	ANTAR	1044	80.5	22.5	18.3	15.5	20.6	8.4	58.2	78.5	588.72	56.4	45.4	12.7	10.3	8.76	11.6	4.75	32.8	44.3
Antar 7	ANTAR	885	80.1	22.1	16.4	13.9	19.4	8.6	56.4	76	420.48	47.5	38.07	10.5	7.8	6.6	9.2	4.1	26.8	36.1
Antar 8	ANTAR	1030	81.1	22.2	17.9	14.1	20.6	9	58.1	79.4	604.87	58.7	47.6	13.03	10.5	8.3	12.1	5.3	34.1	46.6
Antar 9	ANTAR	885	82	22.1	17.1	14.9	20.3	8.6	57.7	78	444	50.15	41.1	11.1	8.6	7.45	10.2	4.3	28.95	39.1
Antar 10	ANTAR	920	80.4	22	16.9	14.8	19.8	8.6	56.6	77.9	470	51.1	41.1	11.26	8.64	7.57	10.1	4.4	28.9	39.8
Antar 11	ANTAR	980	81.5	22.3	16.5	15	20.7	8.9	57.7	78.4	530	54.1	44.1	12.04	8.9	8.1	11.2	4.8	31.2	42.4
Antar 12	ANTAR	989	81	22.1	17.4	14.9	20.2	9	57.7	77.9	563.46	56.98	46.14	12.6	9.91	8.51	11.5	5.1	32.9	44.4
Antar 13	ANTAR	1003	80.4	21.8	17.6	15.4	20.6	9	57.6	78.1	593.36	59.17	47.6	12.9	10.4	9.1	12.2	5.3	34.1	46.2
Antar 14	ANTAR	1221	81.6	22	18	14.7	20.8	8.9	57.5	78.2	821.46	67.26	54.9	14.8	12.1	9.9	14	6	38.7	52.6
Antar 15	ANTAR	998	81	21.9	17.9	15.4	20.9	9	57.8	78.4	596.92	59.84	48.48	13.1	10.7	9.2	12.5	5.4	34.6	46.9
Antar 16	ANTAR	1142	80.6	22.3	17.6	15.5	20.3	8.2	57.8	78.3	720.33	63.1	50.85	14.1	11.1	9.8	12.8	5.2	36.5	49.4
Albania 1	ALBANIA	1124.05	76.1385	24.5714	16.0346	12.0173	17.368	8.27706	52.3636	68.9351	649.14	57.75	43.97	14.19	9.26	6.94	10.03	4.78	30.24	39.81
Albania 2	ALBANIA	1008.46	79.3855	19.2143	16.1416	13.0688	19.0782	9.29599	54.9203	68.3003	518.55	51.42	40.82	9.88	8.3	6.72	9.81	4.78	28.24	35.12
Albania 3	ALBANIA	1346.03	77.8515	23.5703		11.8483	18.4202	10.9005	53.1122	66.9826	426.02	31.65	24.64	7.46		3.75	5.83	3.45	16.81	21.2
Albania 4	ALBANIA	1113.61	80.8428		14.0709	13.0871	16.6326	8.72471	51.6985	69.2965	599.9	53.87	43.55		7.58	7.05	8.96	4.7	27.85	37.33
Albania 5	ALBANIA	993.516	79.2335	21.4795	13.4804	11.0071	17.402	8.66756	51.7825	65.9537	445.89	44.88	35.56	9.64	6.05	4.94	7.81	3.89	23.24	29.6
Albania 6	ALBANIA	1051.64	78.5245	23.3747	14.8649	12.3996	16.618	9.66034	53.1775	67.9693	575.88	54.76	43	12.8	8.14	6.79	9.1	5.29	29.12	37.22
Albania 7	ALBANIA	947.915	78.9286	20.6167	16.0308	12.8286	18.5807	10.3182	50.761	66.1198	479.55	50.59	39.93	10.43	8.11	6.49	9.4	5.22	25.68	33.45
Albania 8	ALBANIA	1102.28		21.2766	16.485	13.9768	19.1835	10.8459			637.23	57.81		12.3	9.53	8.08	11.09	6.27
Albania 9	ALBANIA	988.812	80.394	19.9034	13.622	12.3211	18.5653	8.25125	50.6411	68.3888	532.08	53.81	43.26	10.71	7.33	6.63	9.99	4.44	27.25	36.8
Albania 10	ALBANIA	1124.05	76.1385	24.5714	16.0346	12.0173	17.368	8.27706	52.3636	68.9351	649.14	57.75	43.97	14.19	9.26	6.94	10.03	4.78	30.24	39.81
Albania 11	ALBANIA	1147.31	78.5714	20.6388	16.8129	14.5314	18.5328	8.49421	56.125	70.9723	653.74	56.98	44.77	11.76	9.58	8.28	10.56	4.84	31.98	40.44
Albania 12	ALBANIA	962.284	78.7473	21.4272	15.2608	12.5461	16.6376	10.1609	51.8131	69.5753	496.25	51.57	40.61	11.05	7.87	6.47	8.58	5.24	26.72	35.88
Albania 13	ALBANIA	1013.24	77.1497	19.9411	15.9455	13.4045	19.4439	9.16958	53.2683	69.7477	550.29	54.31	41.9	10.83	8.66	7.28	10.56	4.98	28.93	37.88
Albania 14	ALBANIA	1020.04	80.4616	19.5384	14.9423	11.9379	18.2451	8.51572	51.9698	66.8325	512.67	50.26	40.44	9.82	7.51	6	9.17	4.28	26.12	33.59
Albania 15	ALBANIA	982.011	79.359	19.1721	15.8718	12.8195	18.2182	8.98512	52.4227	67.2262	514.77	52.42	41.6	10.05	8.32	6.72	9.55	4.71	27.48	35.24
Albania 16	ALBANIA	1008.72	79.0646	21.6778	13.8085	12.6949	18.467	9.35412	51.6889	67.7246	543.5	53.88	42.6	11.68	7.44	6.84	9.95	5.04	27.85	36.49
CN1	CN	982.966	76.9475	21.0084	16.466	15.5349	17.3291	8.03997	53.032	68.476	432.8	44.03	33.88	9.25	7.25	6.84	7.63	3.54	23.35	30.15
CN2	CN	1208.88	79.9592	21.4375	16.1645	15.9605	16.5097	6.79535	56.5599	70.7784	770.3	63.72	50.95	13.66	10.3	10.17	10.52	4.33	36.04	45.1
CN3	CN	1226.09	77.7831	20.613	17.6433	14.5148	18.0086	6.17754	55.2803	74.3687	772.07	62.97	48.98	12.98	11.11	9.14	11.34	3.89	34.81	46.83
CN4	CN	1190.13	77.5166	21.219	17.0368	16.7936	19.0793	8.34819	57.3837	74.3232	734.19	61.69	47.82	13.09	10.51	10.36	11.77	5.15	35.4	45.85
CN5	CN	1106.74	79.8725	23.5395	18.4387	16.7672	19.3004	7.09978	59.5209	73.5137	642.24	58.03	46.35	13.66	10.7	9.73	11.2	4.12	34.54	42.66
CN6	CN	749.366	79.2252	19.4892	16.7981	14.3469	16.9695	7.59342	51.8341	68.975	437.18	58.34	46.22	11.37	9.8	8.37	9.9	4.43	30.24	40.24
CN7	CN	1244.56	78.7423	15.3637	12.4784	11.2454	17.2626	7.71887	53.1196	68.8039	504.67	40.55	31.93	6.23	5.06	4.56	7	3.13	21.54	27.9
CN8	CN	1016.62	78.4362	20.4032	16.1271	14.5795	19.4665	7.67664	54.5103	68.988	499.26	49.11	38.52	10.02	7.92	7.16	9.56	3.77	26.77	33.88
CN9	CN	976.134	78.6391	23.6884	16.9822	14.4576	18.5996	7.21893	56.7456	71.1243	494.9	50.7	39.87	12.01	8.61	7.33	9.43	3.66	28.77	36.06
CN10	CN	1103.87	79.0432	21.5289	16.5193	14.9766	20.9395	7.4363	59.1264	70.8788	636.82	57.69	45.6	12.42	9.53	8.64	12.08	4.29	34.11	40.89
CN11	CN	1141.33	75.342	21.5116	19.9213	16.0568	18.8953	7.13064	58.2934	71.3064	667.45	58.48	44.06	12.58	11.65	9.39	11.05	4.17	34.09	41.7
CN12	CN	949.672	79.0955	21.9929	17.8645	13.1169	19.422	9.70163	55.5264	73.541	506.08	53.29	42.15	11.72	9.52	6.99	10.35	5.17	29.59	39.19
CN13	CN	898.105	77.9686	21.1726	13.7992	11.4303	14.8653	8.76518		69.7661	303.29	33.77	26.33	7.15	4.66	3.86	5.02	2.96		23.56
CN14	CN	1057.23	78.4185	22.2199	14.9918	13.6738	15.7125	7.59885	54.2422	70.4489	513.39	48.56	38.08	10.79	7.28	6.64	7.63	3.69	26.34	34.21
CN15	CN	1108.69	76.4987	22.7327	19.3168	15.4398	20.1879	7.83945	57.4893	75.8155	649.14	58.55	44.79	13.31	11.31	9.04	11.82	4.59	33.66	44.39
CN16	CN	1099.08	79.0458	23.7792	17.2123	16.1085	19.6258	8.83068	57.8859	75.0982	587.46	53.45	42.25	12.71	9.2	8.61	10.49	4.72	30.94	40.14
CN17	CN	1008.5	78.7429	21.0687	16.4783	13.371	17.5847	8.56874	54.0254	70.2448	428.41	42.48	33.45	8.95	7	5.68	7.47	3.64	22.95	29.84
MD1	MD	1396.3	78.7817	23.3563	20.1786	15.9906	23.9713	7.90745	65.7929	85.6201	953.53	68.29	53.8	15.95	13.78	10.92	16.37	5.4	44.93	58.47
MD2	MD	1495.84	77.6415	23.6143	20.3522	19.0387	23.8308	8.5739	66.1807	86.8072	1036.32	69.28	53.79	16.36	14.1	13.19	16.51	5.94	45.85	60.14
MD3	MD	987.606	79.33	22.6404	17.8916	14.9557	20.3744	7.48768	63.6453	82.8177	501.21	50.75	40.26	11.49	9.08	7.59	10.34	3.8	32.3	42.03
MD4	MD	1199.75	76.9521	24.9672	20.128	18.1102	22.4409	6.67651	64.3373	84.3996	731.37	60.96	46.91	15.22	12.27	11.04	13.68	4.07	39.22	51.45
MD5	MD	1118.64	79.7619	22.7121	17.0201	14.9368	19.1034	6.02679	63.3929	80.1153	601.38	53.76	42.88	12.21	9.15	8.03	10.27	3.24	34.08	43.07
MD6	MD	1216.63	77.6172	22.6595	20.8762	19.0776	23.505	7.22521	68.4397	86.3951	791.42	65.05	50.49	14.74	13.58	12.41	15.29	4.7	44.52	56.2
MD7	MD	1261.94	81.379	24.0731	19.4095	16.7254	22.6137	7.06257	63.6974	81.7648	752.24	59.61	48.51	14.35	11.57	9.97	13.48	4.21	37.97	48.74
MD8	MD	963.688	77.5279	20.9929	16.7376	15.6636	20.9524	6.66667	63.5461	82.0061	475.58	49.35	38.26	10.36	8.26	7.73	10.34	3.29	31.36	40.47
MD9	MD	979.434	76.5253	21.4343	18.3232	16.7475	20.8687	6.90909	63.2323	81.596	484.82	49.5	37.88	10.61	9.07	8.29	10.33	3.42	31.3	40.39
MD10	MD	1093	76.038	21.362	16.9383	15.3473	16.7443	8.51766	60.0504	78.832	563.33	51.54	39.19	11.01	8.73	7.91	8.63	4.39	30.95	40.63
MD11	MD	1394.86	77.8104	25.567	21.8143	17.0664	23.8538	6.37951	67.6456	86.6699	854.91	61.29	47.69	15.67	13.37	10.46	14.62	3.91	41.46	53.12
MD12	MD	1187.92	79.1939	25.8563	20.6309	17.6199	23.2436	6.27688	66.7835	84.3237	745.66	62.77	49.71	16.23	12.95	11.06	14.59	3.94	41.92	52.93
MD13	MD	1144.18	76.0886	21.0284	19.3342	16.6295	21.2959	6.24164	67.1422	86.0603	769.92	67.29	51.2	14.15	13.01	11.19	14.33	4.2	45.18	57.91
MD14	MD	1067.73	79.8638	23.302	18.7742	16.9888	20.9829	6.27646	62.1756	78.7962	580.1	54.33	43.39	12.66	10.2	9.23	11.4	3.41	33.78	42.81
MD15	MD	1313.28	77.9354	24.8566	20.4196	17.9596	23.5587	6.48959	71.7175	84.2741	870.18	66.26	51.64	16.47	13.53	11.9	15.61	4.3	47.52	55.84
MON1	MON	1220.72	78.8126	20.6273	17.0267	15.8585	21.3314	9.3615	57.9453	81.293	762.83	62.49	49.25	12.89	10.64	9.91	13.33	5.85	36.21	50.8
MON2	MON	1157.98	78.5529	20.7187	18.2583	15.6199	20.2169	8.31984	56.5879	75.4289	715.4	61.78	48.53	12.8	11.28	9.65	12.49	5.14	34.96	46.6
MON3	MON	1254.89	76.2908	21.4379	17.9739	15.6536	21.9281	10.2451	60.2288	80.8497	767.99	61.2	46.69	13.12	11	9.58	13.42	6.27	36.86	49.48
MON4	MON	1386.48	76.6302	22.471	18.2873	16.3262	21.5558	9.4133	60.9086	80.8792	848.39	61.19	46.89	13.75	11.19	9.99	13.19	5.76	37.27	49.49
MON5	MON	1299.29	76.9242	23.9928	19.558	16.341	21.2117	10.5983	62.1768	82.3662	864.29	66.52	51.17	15.96	13.01	10.87	14.11	7.05	41.36	54.79
MON6	MON	1336.84	78.0797	25.0708	21.8203	18.3031	25.0208	10.9018	64.8941	83.4972	801.97	59.99	46.84	15.04	13.09	10.98	15.01	6.54	38.93	50.09
MON7	MON	1399.07	76.272	21.1676	19.9772	18.2811	20.6295	9.11611	61.9537	84.5727	857.91	61.32	46.77	12.98	12.25	11.21	12.65	5.59	37.99	51.86
MON8	MON	861.553	78.1572	20.2214	18.6623	14.8893	18.0698	8.88681	56.6573	77.7362	552.6	64.14	50.13	12.97	11.97	9.55	11.59	5.7	36.34	49.86
MON9	MON	998.668		26.8354	16.1634	14.5056	20.2043	6.82356	57.1152	74.1267	674.7	67.56		18.13	10.92	9.8	13.65	4.61	38.587	50.08
MON10	MON	1265.24	77.2183	22.6775	20.0729	17.3468	21.1495	9.01198	60.3924	80.3438	728.65	57.59	44.47	13.06	11.56	9.99	12.18	5.19	34.78	46.27
MON11	MON	974.596	75.8821	20.0565	16.7477	14.1289	17.4533	8.06022	59.2128	79.2379	621.5	63.77	48.39	12.79	10.68	9.01	11.13	5.14	37.76	50.53
MON12	MON	1079.91	77.1463	21.679	17.9997	18.8288	21.9727	9.50078	62.8779	84.2633	625.16	57.89	44.66	12.55	10.42	10.9	12.72	5.5	36.4	48.78
MON13	MON	1090.8	75.7074	22.8965	19.5458	16.1951	20.4393	8.67461	61.8019	81.7014	585.98	53.72	40.67	12.3	10.5	8.7	10.98	4.66	33.2	43.89
MON14	MON	1030.99	73.4128	21.5277	17.8064	15.7826	19.5038	9.04195	60.519	80.1208	631.69	61.27	44.98	13.19	10.91	9.67	11.95	5.54	37.08	49.09
