# Supplementary material for: Morphological and genetic variability in cosmopolitan tardigrade species—Paramacrobiotus fairbanksi Schill, Förster, Dandekar & Wolf, 2010
Source: Sci Rep. 2023 Oct 17;13:17672. doi: 10.1038/s41598-023-42653-6 (PMC10582252; doi:10.1038/s41598-023-42653-6)
Supplement: Supplementary file 11 — Supplementary Information 11. [file 41598_2023_42653_MOESM11_ESM.xlsx]

## Sheet: Arkusz1
CHARACTER	POPUL	EBD	EFD	PH1	PH2	PH3	PBW1	PBW2	PBW3	NPEC
PL 1	PL	65.2	92.2	15.1	13.4	14	18.7	15.3	15.6	11
PL 2	PL	64.2	87.9	13.2	14	13.7	16.2	15.8	16.6	11
PL 3	PL	62.4	91.2	16	15.3	16.2	16.5	15.3	16.5	12
PL 4	PL	59.4	84.6	14.5	16.4	13.4	17.6	19.2	15.5	11
PL 5	PL	59.4	84.9	13.5	14.1	13.1	15.7	16.1	14.9	12
PL 6	PL	68	93.1	15	14.4	16.5	16.6	15.4	16.8	11
PL 7	PL	64.6	91.5	14.7	14.1	15.2	16.6	14.5	15.6	12
PL 8	PL	61.5	89.56	15.4	14.8	15.1	16.8	18.4	15.1	12
PL 9	PL	68.5	87.5	12.1	11.5	12.2	15.9	15.4	14.3	12
PL 10	PL	64.4	93.7	14.6	15.7	14.8	16.4	17.7	15.6	12
PL 11	PL	64.9	91	13.6	13.3	13.8	17.6	16.3	16.4	11
PL 12	PL	68.3	90.2	12	11.7	13.4	16	15.9	17.5	11
PL 13	PL	72.1	96.6	13.9	13.8	13.4	17.9	18.3	17.5	11
PL 14	PL	74.5	98.3	12.7	13	11.7	15.7	17.4	15.7	12
PL 15	PL	75	98.7	12.9	13.2	13.3	17.2	16	16	12
USA 1	USA	62.1	84.1	13.4	12.76	13.76	17.9	15.65	16.5	12
USA 2	USA	81.86	104.84	9.31	6.25	8.3	18.58	20.29	16.68	11
USA 3	USA	82.57	105.83	11.52	11.91	12.11	22.16	22.56	18.07	10
USA 4	USA	69.32	90.15	9.8			14.1			14
USA 5	USA	67.4	93.2	11.2			17			11
USA 6	USA	67.8	97.9	10.4			21.3			14
USA 7	USA	67.8	84.8	10.3			14.7			16
USA 8	USA	72	92.1	11.7			20.2			17
USA 9	USA	77	95.9	14.3			21.3			15
USA 10	USA	73.6	86.3	9.9			17.7			13
USA 11	USA	67.8	90.9	11.2			18.2			17
USA 12	USA	62.8	86.7	11.9			16.5			12
USA 13	USA	69.3	89.4	11.6			14.5			14
USA 14	USA	70.9	96.3	12.5			19.7			14
USA 15	USA	71.3	92.9	13.1			16.1			12
USA 16	USA	70.9	89.4	11.4			17.2			20
USA 17	USA	67.8	94	11.2			18.6			13
USA 18	USA	73.2	89.4	12.1			17.4			15
Antar 1	ANTAR	76.03	98.27	12.39	12.13	12.18	17.2	16.7	16.7	12
Antar 2	ANTAR	77.3	100.7	13.5	13.6	13.5	19.6	19.3	19.6	12
Antar 3	ANTAR	79.45	99.65	10.55	10.24	10.1	15.2	14.9	14.6	12
Antar 4	ANTAR	68.5	90.2	12.86	12.7	12.2	17.3	17.4	16.8	12
Antar 5	ANTAR	82	107	13.6	13.4	13.1	19.8	19.2	19.1	12
Antar 6	ANTAR	77.3	101.4	11.1	11.6	11.4	14.8	15.1	14.9	12
Antar 7	ANTAR	71.5	95.5	12.6	12.8	12.5	16.4	16.9	16.2	12
Antar 8	ANTAR	72.56	95.46	12.88	12.81	12.81	17.8	17.2	17.1	12
Antar 9	ANTAR	75.42	98.2	12.4	12.6	12.3	16.4	16.8	16.2	12
Antar 10	ANTAR	77.36	98.32	11.5	11.7	11.8	15.4	15.7	15.9	12
Antar 11	ANTAR	81.66	103.2	11.71	11.33	11.8	15.6	15.8	15.9	12
Antar 12	ANTAR	77.2	98.2	12.4	12.1	11.9	17.1	17.2	17.1	12
Antar 13	ANTAR	75.81	99.29	12.4	12.6	12.7	17.2	17.1	16.9	12
Antar 14	ANTAR	78.1	100.7	13.56	14.45	12.09	18.4	19.1	16.8	12
Antar 15	ANTAR	78.7	100.1	12.1	12.02	13.01	16.7	16.2	17.5	12
Antar 16	ANTAR	75.3	98.98	11.57	12.2	11.5	15.71	16.56	15.3	12
Albania 1	ALBANIA	76.48	89.48	10.19	11.07	11.26	13.48	15.8	16.12	15
Albania 2	ALBANIA	68.11	89.47	15	11.44	12.76	18.75	13.54	17.34	13
Albania 3	ALBANIA	85.89	106.58	14.44	17.33	10.05	16.91	20.27	16	14
Albania 4	ALBANIA	89.34	104.39	10.51	14.58	13.1	15.03	16.97	16.54	14
Albania 5	ALBANIA	95.39	116.86	13.31	14.69	13.1	19.88	17.03	16.28	16
Albania 6	ALBANIA	63.84	89.56	8.79	7.63	10.95	9.71	11.23	10.97	16
Albania 7	ALBANIA	69.55	94.07	15.31	13.2	14.16	17.64	15.73	19.65	14
Albania 8	ALBANIA	63.75	86.17	13.25	12.54	12.96	14.56	14.53	14.42	13
Albania 9	ALBANIA	78.14	95.28	12.1	9.6	11.36	14.67	14.59	14.81	13
Albania 10	ALBANIA	85.96	100.61	8.01	10.53	12.55	14.2	14.17	13.23	13
Albania 11	ALBANIA	72.72	100.46	13.64	12.56	12.7	15.52	16.97	16.82	15
Albania 12	ALBANIA	84.6	103.2	11.41	10.41	10.97	16.73	16.69	16.84	15
Albania 13	ALBANIA	80.06	106.12	10.83	11.83	13.9	14.69	13.67	16.82	14
Albania 14	ALBANIA	77.4	96.5	9.53	9.65	10.54	13.73	14.26	15.18	14
Albania 15	ALBANIA	77.24	98.72	12.85	12.43	12.47	15.53	13.97	13.78	13
CN1	CN	68.47	93.8	14.18	14.86	15.95	15.56	15.48	16.5	11
CN2	CN	80.48	104.76	12.43	12.99	14.53	15.1	14.79	15.31	10
CN3	CN	69.75	93.64	11.29	13.67	14.46	14.64	14.92	15.93	12
CN4	CN	68.44	96.12	15.59	12.78	14.56	15.8	15.27	17.65	10
CN5	CN	68.65	92.5	16.63	12.69	14.52	17.87	16.38	16.18	12
CN6	CN	62.86	98.24	16.95	15.03	16.61	16.94	17.72	16.63	11
CN7	CN	63.91	94.76	12.98	14.86	13.09	15.14	18.06	17.84	11
CN8	CN	81.14	108.12	13.27	12.32	13.54	13.73	13.59	13.97	12
CN9	CN	79.18	99.99	12.76	12.51	12.92	15.4	15.6	15.92	10
CN10	CN	67.01	95.6	15.17	14.77	14.34	16.66	15.84	18.9	10
CN11	CN	89.73	115.73	15.01	13.79	12.94	16.14	17.03	16.18	10
CN12	CN	89.06	117.48	11.28	11.26	12.2	14.97	13.93	14.45	10
CN13	CN	88.89	112.32
CN14	CN	79.32	110.58	15	15.65	15.25	15.01	17.21	15.91	11
CN15	CN	67.46	88.71	11.27	12.98	13.28	14.57	15.9	15.38	11
MD1	MD	80.89	108.54	16.37	17.43	17.72	19.45	17.38	16.58	13
MD2	MD	83.41	116.14	14.54	15.91	17.21	15.1	16.53	16.22	12
MD3	MD	79.67	117.7	19.55	17.35	18.44	20.36	19.25	18.01	12
MD4	MD	97.61	141.69	22.98	22.78	21.86	23.83	22.38	20.41	14
MD5	MD	84.37	118.66	16.58	15.55	17.58	17.6	17.41	19.03	12
MD6	MD	78.3	112.72	16.49	17.92	17.99	18.91	21.07	19.3	13
MD7	MD	75.19	117.14	17.32	18.79	20.96	18.25	18.22	20.5	12
MD8	MD	90.34	124.62	19.79	19.46	20.71	22.74	20.53	21.67	11
MD9	MD	81.87	113.18	14.93	17.6	19.88	16.92	19.643	19.56	13
MD10	MD	74.88	110.9	13.65	15.6	14.31	17.12	19.07	17.86	12
MD11	MD	85.37	112.71	15	14.66	14.95	17.03	16.23	17.12	13
MD12	MD	86.73	122.24	17.79	18.65	17.07	18.08	17.28	16.89	11
MD13	MD	75.17	107.65	16.39			16.41			14
MD14	MD	80.77	118.74	16.56	20.34	17.16	17.72	23.5	19.2	12
MD15	MD	88.76	120.15	19.13	18.94	17.26	18.26	18.46	17.76	12
MON1	MON	64.04	87.44	13.23	13.82	16.5	16.58	18.36	18.82	15
MON2	MON	64.08	91.08	14.17	13.86	13.44	16.35	17.18	17.15
MON3	MON	80.2	112.35	16.71	16.68	16.41	21.49	21.67	20.38	11
MON4	MON	83.47	103.51	12.39
MON5	MON	74.04	96.36	14.69	16.86	12.9	16.69	19.83	16.06	11
MON6	MON	72.25	90.14	11.04	12.37	12.04	15.15	15.01	15.18	12
